# Supplementary material
Source: PubMed Central journal article supplement (PMC2785347)

### SUPPLEMENTAL FIGURE LEGENDS

**Figure S1. Time course for PUMA and NOXA protein levels during treatment with palmitate or oleate.** A and B, Whole cell lysates were prepared from Huh-7 cells treated with palmitic acid (PA) or oleic acid (OA) at 800  $\mu$ M at the indicated time intervals. Immunoblot analysis was performed for PUMA and NOXA protein expression.  $\beta$ -actin was used as control for protein loading. PUMA/ $\beta$ -actin and NOXA/ $\beta$ -actin ratios were calculated by densitometry and normalized to time 0.

Figure S1

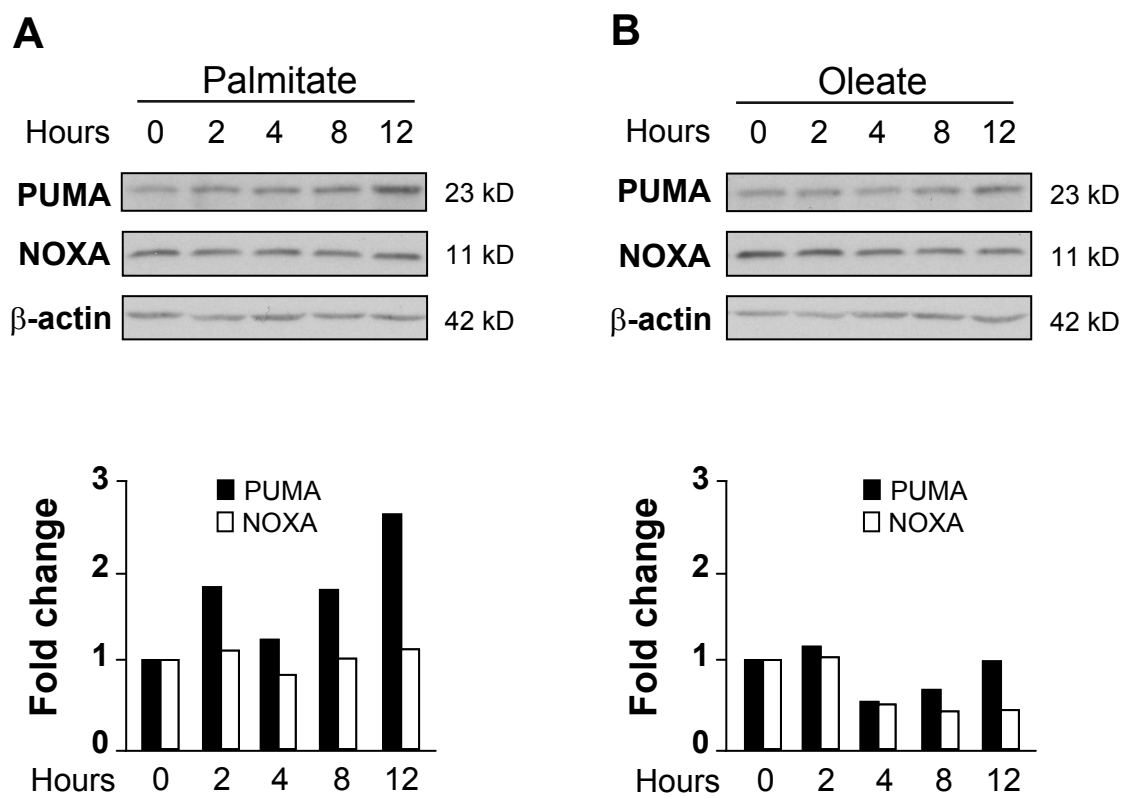

Supplement: supp_M109.022491_jbc.M109.022491-1.pdf [file supp_M109.022491_jbc.M109.022491-1.pdf]
